# Supplementary material for: Oxyhydroxide-Coated PEO–Treated Mg Alloy for Enhanced Corrosion Resistance and Bone Regeneration
Source: MDPI journal article supplement (doi:10.3390/jfb13020050), 2022-05-01
Supplement: s1 [file s1]

# Supporting Information

## Oxyhydroxide coated PEO-treated Mg alloy for enhanced corrosion resistance and bone regeneration

Juning Xie<sup>1,2,#</sup>, Shi Cheng<sup>2,#</sup>, Guoqing Zhong<sup>2,3</sup>, Ruixiang Zhou<sup>2,4</sup>, Chi Zhang<sup>2</sup>, Yue He<sup>1,2</sup>, Yu Zhang<sup>2,1,\*</sup>, Feng Peng<sup>2,\*</sup>

<sup>1</sup> *School of medicine, South China university of Technology, Guangzhou 510006, China*

<sup>2</sup> *Medical Research Center, Department of Orthopedics, Guangdong Provincial People's Hospital, Guangdong Academy of Medical Sciences, 510080, China*

<sup>3</sup> *Shantou University Medical College, Shantou 515041, China*

<sup>4</sup> *Jinzhou Medical University, Jinzhou, 121001, Liaoning, China*

*#Juning Xie and Shi Cheng contribute equally to this work.*

**\*Correspondence: zhangyu@gdph.org.cn (Y.Z.) pengfeng@gdph.org.cn (F.P.)**

**Table S1.** Primer sequences of the osteogenesis-related genes used in this study.

| Genes       | Forward sequence       | Reverse sequence          |
|-------------|------------------------|---------------------------|
| GAPDH (rat) | AAGGTCGGTGTGAACGGATTTG | TGTAGTTGAGGTCAATGAAGGGGTC |
| ALP         | GCACAACATCAAGGACATCG   | TCAGTTCTGTTCTTGGGGTACAT   |
| RUNX2       | TGTGTGCCTCCAACCTGTGT   | CTTTCCCCCTCAATTTGTGTCA    |
| OCN         | ATAGACTCCGGCGCTACCTC   | CCAGGGGATCTGGGTAGG        |
| COL-I       | GAAGACCTGGCGAGAGAGGA   | TCAATCCATCCAGACCGTTG      |
| OPN         | CCAGCCAAGGACCAACTACA   | AGTGTTTGCTGTAATGCGCC      |

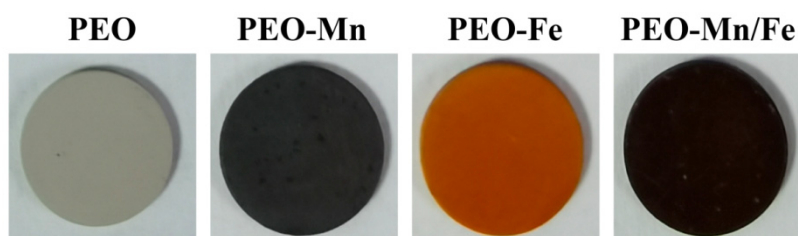

**Figure S1.** Representative optical images of PEO, PEO-Mn, PEO-Fe, and PEO-Mn/Fe samples.

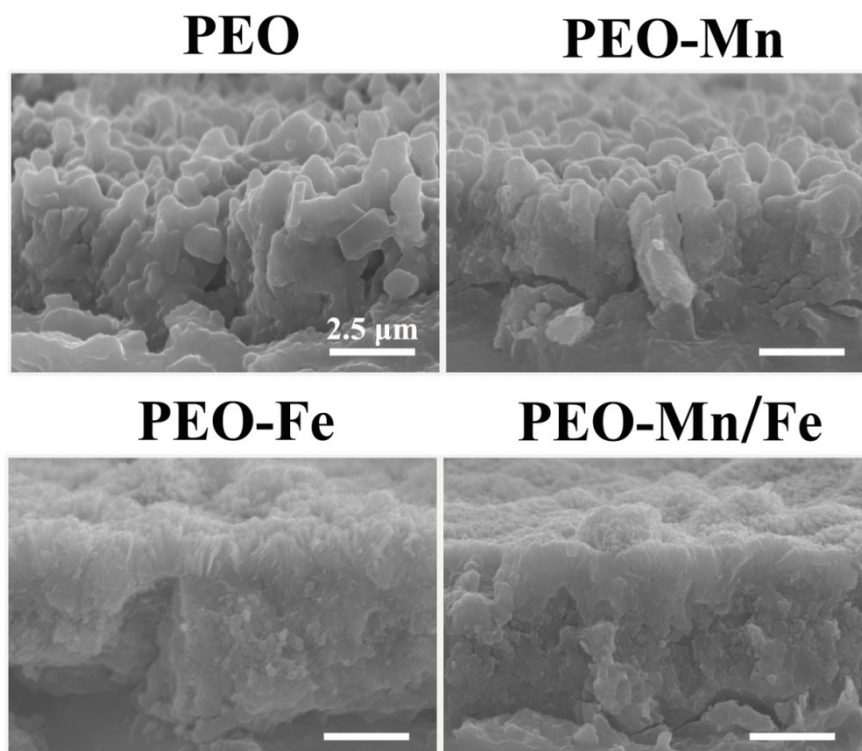

**Figure S2.** Cross-section images of PEO, PEO-Mn, PEO-Fe, and PEO-Mn/Fe samples.
